# Supplementary material for: Melatonin Treatment to Pomegranate Trees Enhances Fruit Bioactive Compounds and Quality Traits at Harvest and during Postharvest Storage
Source: MDPI journal article supplement (doi:10.3390/antiox10060820), 2021-05-21
Supplement: s1 [file s1]

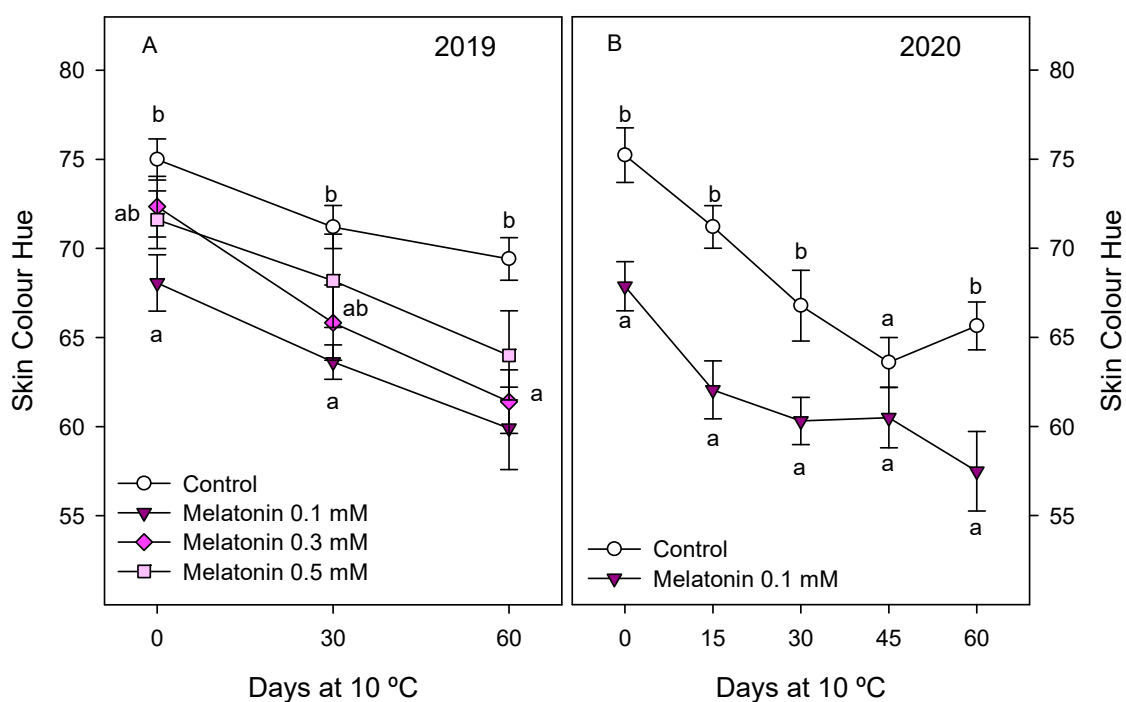

**Figure S1.** Skin colour hue of pomegranate fruit from control and melatonin-treated trees during storage at 10 °C. Data are the mean  $\pm$  SE. Different letters show significant differences ( $p < 0.05$ ) among treatments for each sampling date.

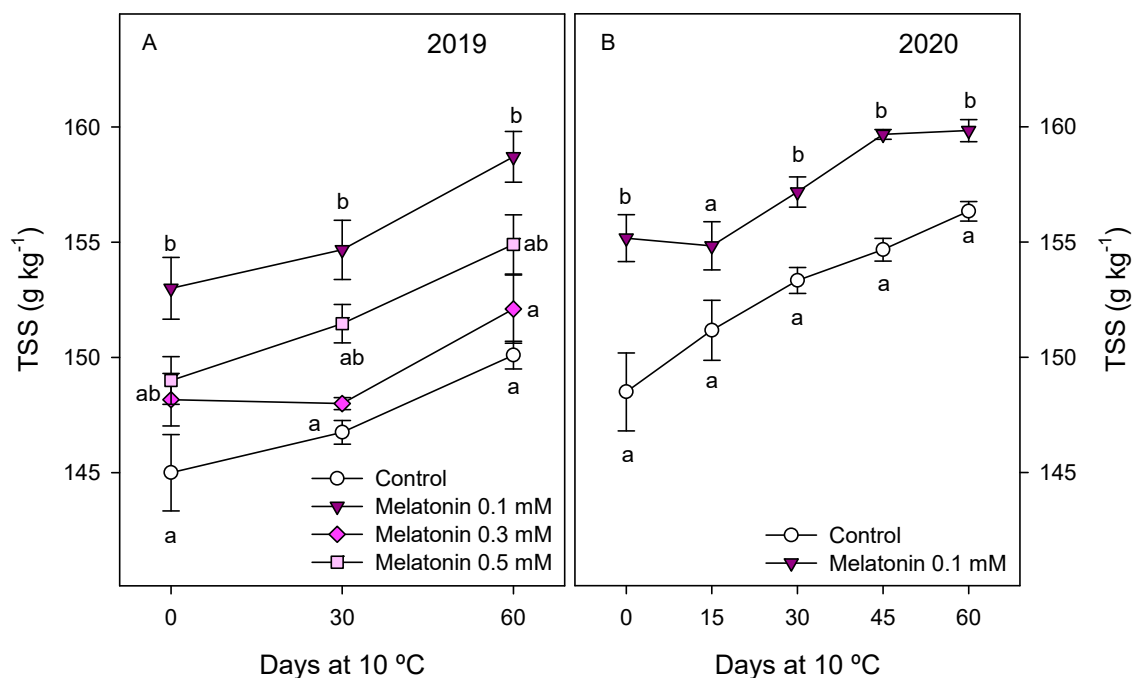

**Figure S2.** Total soluble solids (TSS) in arils of pomegranate fruit from control and melatonin-treated trees during storage at 10 °C. Data are the mean  $\pm$  SE. Different letters show significant differences ( $p < 0.05$ ) among treatments for each sampling date.

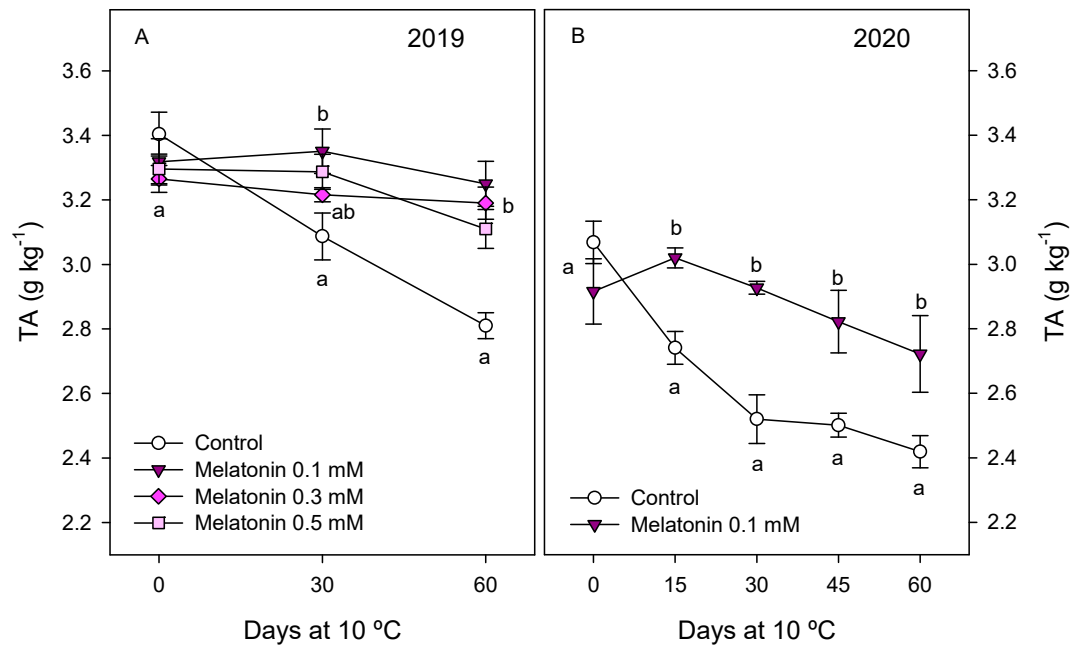

**Figure S3.** Titratable acidity (TA) in arils of pomegranate fruit from control and melatonin-treated trees during storage at 10 °C. Data are the mean  $\pm$  SE. Different letters show significant differences ( $p < 0.05$ ) among treatments for each sampling date.
